# Supplementary material for: Diffusion mechanisms and preferential dynamics of promoter molecules in ZSM-5 zeolite
Source: Royal Society of Chemistry journal article supplement (doi:10.1039/d4cy00506f), 2024-01-01
Supplement: d4cy00506f2.pdf [file d4cy00506f2.pdf]

## Electronic Supporting Information

# Diffusion Mechanisms and Preferential Dynamics of Promoter Molecules in ZSM-5 Zeolite<sup>†</sup>

Josh Dunn,<sup>\*a</sup> Joe Crossley-Lewis,<sup>a</sup> Andrew R. McCluskey,<sup>a,b,c</sup> Fiona Jackson,<sup>d</sup> Corneliu Buda,<sup>e</sup> Glenn J. Sunley,<sup>d</sup> Adrian J. Mulholland,<sup>a</sup> and Neil L. Allan<sup>a</sup>

<sup>a</sup> Centre for Computational Chemistry, School of Chemistry, University of Bristol, Bristol, BS8 1TS, UK.

<sup>b</sup> European Spallation Source, Ole Maaløes vej 3, 2200 København N, DK.

<sup>c</sup> Diamond Light Source, Harwell Campus, Didcot, OX11 0DE, UK.

<sup>d</sup> Applied Sciences, bp Innovation and Engineering, BP plc, Saltend, Hull, HU12 8DS, UK.

<sup>e</sup> Applied Sciences, bp Innovation and Engineering, BP plc, 30 South Wacker Drive, Chicago, IL 60606, USA.

## Contents

|     |                                            |    |
|-----|--------------------------------------------|----|
| 1   | Zeolite Lattice Parameters                 | 1  |
| 2   | Molecular Mechanics Force Field Potentials | 1  |
| 3   | MSD plots                                  | 5  |
| 3.1 | Aliphatic ester promoters                  | 5  |
| 3.2 | Aromatic aldehyde promoters                | 8  |
| 4   | Spatial Probability Distribution           | 11 |
| 5   | Thermostat tests                           | 12 |

### 1 Zeolite Lattice Parameters

The MFI structure used in this study is taken from the Database of Zeolite Structure.<sup>1</sup>

The lattice parameters are as follows; a: 20.0900 Å, b: 19.7380 Å, c: 13.1420 Å,  $\alpha$ : 90°,  $\beta$ : 90°,  $\gamma$ : 90°.

### 2 Molecular Mechanics Force Field Potentials

What follows are the force field parameters for the simulations described in the main text. All atoms were subject to standard Coulombic interaction potential eq. (1), this was applied directly in the short range and by a particle-particle particle-mesh solver in the long range.<sup>2</sup> Silicon atoms were assigned a charge of +4 and zeolite oxygens a charge of -2; all other charges were assigned according to the OPLS force field scheme.<sup>3,4</sup>

Coulombic:

$$E = \frac{Cq_iq_j}{\epsilon r} \quad (1)$$

Buckingham:

$$E = Ae^{-r/\rho} - \frac{C}{r^6} \quad (2)$$

Lennard-Jones:

$$E = 4\epsilon \left[ \left( \frac{\sigma}{r} \right)^{12} - \left( \frac{\sigma}{r} \right)^6 \right] \quad (3)$$

Bonds:

$$E = K(r - r_0)^2 \quad (4)$$

Angles:

$$E = K(r - \theta_0)^2 \quad (5)$$

Dihedrals:

$$E = \frac{1}{2}K_1[1 + \cos(\phi)] + \frac{1}{2}K_3[1 + \cos(2\phi)] + \frac{1}{2}K_2[1 + \cos(3\phi)] + \frac{1}{2}K_4[1 + \cos(4\phi)] \quad (6)$$

Improper:

$$E = K[1 + d\cos(n\phi)] \quad (7)$$

**Table 1** Zeolite Buckingham potentials of the form in eq. (2)

| Atom 1      | Atom 2      | $A / (\text{kcal mol}^{-1})$ | $\rho / \text{\AA}$ | $C / (\text{kcal mol}^{-1}\text{\AA}^6)$ |
|-------------|-------------|------------------------------|---------------------|------------------------------------------|
| Si          | O (zeolite) | 29607.6012                   | 0.32052             | 245.8618956                              |
| O (zeolite) | O (zeolite) | 524950.3537                  | 0.149               | 642.928126                               |

**Table 2** Lennard-Jones potentials of the form in eq. (3)

| Atom 1               | Atom 2               | $\epsilon / (\text{kcal mol}^{-1})$ | $\sigma / \text{\AA}$ |
|----------------------|----------------------|-------------------------------------|-----------------------|
| O (carbonyl)         | O (carbonyl)         | 0.21                                | 2.96                  |
| O (carbonyl)         | C (sp <sup>2</sup> ) | 0.1212                              | 3.2416                |
| O (carbonyl)         | C (sp <sup>3</sup> ) | 0.1177                              | 3.2187                |
| O (carbonyl)         | H-sp <sup>2</sup>    | 0.251                               | 2.7203                |
| O (carbonyl)         | H-sp <sup>3</sup>    | 0.251                               | 2.6764                |
| O (carbonyl)         | O (ester)            | 0.1715                              | 2.9298                |
| C (sp <sup>2</sup> ) | C (sp <sup>2</sup> ) | 0.07                                | 3.55                  |
| C (sp <sup>2</sup> ) | C (sp <sup>3</sup> ) | 0.068                               | 3.5249                |
| C (sp <sup>2</sup> ) | H-sp <sup>2</sup>    | 0.145                               | 2.9791                |
| C (sp <sup>2</sup> ) | H-sp <sup>3</sup>    | 0.145                               | 2.931                 |
| C (sp <sup>2</sup> ) | O (ester)            | 0.099                               | 3.2086                |
| C (sp <sup>3</sup> ) | C (sp <sup>3</sup> ) | 0.066                               | 3.5                   |
| C (sp <sup>3</sup> ) | H-sp <sup>2</sup>    | 0.1407                              | 2.958                 |
| C (sp <sup>3</sup> ) | H-sp <sup>3</sup>    | 0.1407                              | 2.9103                |
| C (sp <sup>3</sup> ) | O (ester)            | 0.0961                              | 3.1859                |
| H-sp <sup>2</sup>    | H-sp <sup>2</sup>    | 0.3                                 | 2.5                   |
| H-sp <sup>2</sup>    | H-sp <sup>3</sup>    | 0.3                                 | 2.4597                |
| H-sp <sup>2</sup>    | O (ester)            | 0.2049                              | 2.6492                |
| H-sp <sup>3</sup>    | H-sp <sup>3</sup>    | 0.3                                 | 2.42                  |
| H-sp <sup>3</sup>    | O (ester)            | 0.2049                              | 2.6492                |
| O (ester)            | O (ester)            | 0.14                                | 2.9                   |

**Table 3** Lennard-Jones potentials of the form in eq. (3)

| Atom 1               | Atom 2      | $\epsilon / (\text{kcal mol}^{-1})$ | $\sigma / \text{\AA}$ |
|----------------------|-------------|-------------------------------------|-----------------------|
| O (carbonyl)         | Si          | 0.19442                             | 3.2785                |
| O (carbonyl)         | O (zeolite) | 0.20494                             | 2.744                 |
| C (sp <sup>2</sup> ) | Si          | 0.13748                             | 3.6304                |
| C (sp <sup>2</sup> ) | O (zeolite) | 0.14849                             | 3.0959                |
| C (sp <sup>3</sup> ) | Si          | 0.13748                             | 3.6304                |
| C (sp <sup>3</sup> ) | O (zeolite) | 0.14849                             | 3.0959                |
| H-sp <sup>2</sup>    | Si          | 0                                   | 1.6704                |
| H-sp <sup>2</sup>    | O (zeolite) | 0                                   | 1.4254                |
| H-sp <sup>3</sup>    | Si          | 0                                   | 1.6704                |
| H-sp <sup>3</sup>    | O (zeolite) | 0                                   | 1.4254                |
| O (ester)            | Si          | 0.19442                             | 3.2785                |
| O (ester)            | O (zeolite) | 0.20494                             | 2.744                 |

**Table 4** Lennard-Jones potentials of the form in eq. (3)

| Atom 1               | Atom 2       | $\epsilon / (\text{kcal mol}^{-1})$ | $\sigma / \text{\AA}$ |
|----------------------|--------------|-------------------------------------|-----------------------|
| O (carbonyl)         | C (methanol) | 0.18894                             | 3.03895               |
| C (sp <sup>2</sup> ) | C (methanol) | 0.10909                             | 3.32806               |
| C (sp <sup>3</sup> ) | C (methanol) | 0.10592                             | 3.30454               |
| H-sp <sup>2</sup>    | C (methanol) | 0.07141                             | 2.79285               |
| H-sp <sup>3</sup>    | C (methanol) | 0.07141                             | 2.7478                |
| O (ester)            | C (methanol) | 0.15427                             | 3.00799               |
| Si                   | C (methanol) | 0.13748                             | 3.6304                |
| O (zeolite)          | C (methanol) | 0.14849                             | 3.0959                |
| C (methanol)         | C (methanol) | 0.17                                | 3.12                  |
| C (methanol)         | H (methanol) | 0                                   | 0                     |
| O (carbonyl)         | H (methanol) | 0                                   | 0                     |
| C (sp <sup>2</sup> ) | H (methanol) | 0                                   | 0                     |
| C (sp <sup>3</sup> ) | H (methanol) | 0                                   | 0                     |
| H-sp <sup>2</sup>    | H (methanol) | 0                                   | 0                     |
| H-sp <sup>3</sup>    | H (methanol) | 0                                   | 0                     |
| O (ester)            | H (methanol) | 0                                   | 0                     |
| Si                   | H (methanol) | 0                                   | 0                     |
| O (zeolite)          | H (methanol) | 0                                   | 0                     |

**Table 5** Bond potentials of the form in eq. (4)

| Atom 1               | Atom 2               | $K / (\text{kcal mol}^{-1})$ | $r_0 / \text{\AA}$ |
|----------------------|----------------------|------------------------------|--------------------|
| C (sp <sup>2</sup> ) | O (aldehyde)         | 570                          | 1.229              |
| C (aldehyde)         | C (sp <sup>2</sup> ) | 400                          | 1.49               |
| C (sp <sup>2</sup> ) | C (sp <sup>2</sup> ) | 469                          | 1.4                |
| C (sp <sup>2</sup> ) | C (sp <sup>3</sup> ) | 317                          | 1.51               |
| C (sp <sup>3</sup> ) | C (sp <sup>3</sup> ) | 268                          | 1.529              |
| C (sp <sup>3</sup> ) | H-sp <sup>3</sup>    | 340                          | 1.09               |
| C (sp <sup>2</sup> ) | H-sp <sup>2</sup>    | 367                          | 1.08               |
| C (methanol)         | O (methanol)         | 320                          | 1.41               |
| O (methanol)         | H-O (methanol)       | 553                          | 0.945              |

**Table 6** Angle potentials of the form in eq. (5)

| Atom 1               | Atom 2               | Atom 3               | $K / (\text{kcal mol}^{-1})$ | $\theta_0 / \text{\AA}$ |
|----------------------|----------------------|----------------------|------------------------------|-------------------------|
| C (sp <sup>2</sup> ) | C (sp <sup>2</sup> ) | H-sp <sup>2</sup>    | 35                           | 120                     |
| O (aldehyde)         | C (sp <sup>2</sup> ) | H-sp <sup>2</sup>    | 35                           | 123                     |
| C (sp <sup>3</sup> ) | C (sp <sup>3</sup> ) | H-sp <sup>3</sup>    | 37.5                         | 110.7                   |
| C (sp <sup>3</sup> ) | C (sp <sup>3</sup> ) | C (sp <sup>3</sup> ) | 58.35                        | 112.7                   |
| C (sp <sup>2</sup> ) | C (sp <sup>3</sup> ) | C (sp <sup>3</sup> ) | 63                           | 114                     |
| C (sp <sup>2</sup> ) | C (sp <sup>2</sup> ) | C (sp <sup>2</sup> ) | 63                           | 120                     |
| C (sp <sup>2</sup> ) | C (sp <sup>2</sup> ) | C (sp <sup>3</sup> ) | 70                           | 120                     |
| O(aldehyde)          | C (aldehyde)         | C (sp <sup>2</sup> ) | 80                           | 120.4                   |
| C (aldehyde)         | C (sp <sup>2</sup> ) | C (sp <sup>2</sup> ) | 85                           | 120                     |
| C (sp <sup>2</sup> ) | C (sp <sup>3</sup> ) | H-sp <sup>3</sup>    | 35                           | 109.5                   |
| H-sp <sup>3</sup>    | C (sp <sup>3</sup> ) | H-sp <sup>3</sup>    | 33                           | 107.8                   |
| C (sp <sup>2</sup> ) | C (aldehyde)         | H (aldehyde)         | 35                           | 115                     |
| C (methanol)         | O (methanol)         | H-O (methanol)       | 55                           | 108.5                   |

**Table 7** Dihedral potentials of the form in eq. (6); values for  $K_n$  are given in units of (kcal mol<sup>-1</sup>).

| Atom 1               | Atom 2               | Atom 3               | Atom 4               | $K_1$ | $K_2$ | $K_3$ | $K_4$ |
|----------------------|----------------------|----------------------|----------------------|-------|-------|-------|-------|
| C (sp <sup>3</sup> ) | C (sp <sup>3</sup> ) | C (sp <sup>2</sup> ) | C (sp <sup>2</sup> ) | 0     | 0     | 0     | 0     |
| H-sp <sup>3</sup>    | C (sp <sup>3</sup> ) | C (sp <sup>3</sup> ) | C (sp <sup>3</sup> ) | 0     | 0     | 0.3   | 0     |
| H-sp <sup>3</sup>    | C (sp <sup>3</sup> ) | C (sp <sup>3</sup> ) | C (sp <sup>2</sup> ) | 0     | 0     | 0.462 | 0     |
| H (aldehyde)         | C (aldehyde)         | C (sp <sup>2</sup> ) | C (sp <sup>2</sup> ) | 0     | 0.2   | 0     | 0     |
| C (sp <sup>2</sup> ) | C (sp <sup>2</sup> ) | C (aldehyde)         | O (aldehyde)         | 0     | 2.1   | 0     | 0     |
| H-sp <sup>2</sup>    | C (sp <sup>2</sup> ) | C (sp <sup>2</sup> ) | C (sp <sup>2</sup> ) | 0     | 7.25  | 0     | 0     |
| C (sp <sup>3</sup> ) | C (sp <sup>3</sup> ) | C (sp <sup>3</sup> ) | C (sp <sup>2</sup> ) | 1.3   | -0.2  | 0.2   | 0     |
| H-O (methanol)       | O (methanol)         | C (methanol)         | H (methanol)         | 0     | 0     | 0.352 | 0     |

**Table 8** Improper potentials of the form in eq. (7)

| Atom 1               | Atom 2               | Atom 3               | Atom 4               | $K / (\text{kcal mol}^{-1})$ | $d$ | $n$ |
|----------------------|----------------------|----------------------|----------------------|------------------------------|-----|-----|
| C (sp <sup>2</sup> ) | H-sp <sup>2</sup>    | C (sp <sup>2</sup> ) | C (sp <sup>2</sup> ) | 0                            | -1  | 2   |
| C (sp <sup>2</sup> ) | C (sp <sup>2</sup> ) | C (sp <sup>2</sup> ) | C (sp <sup>3</sup> ) | 2.5                          | -1  | 2   |
| O (aldehyde)         | C (aldehyde)         | C (sp <sup>2</sup> ) | H (aldehyde)         | 10.5                         | -1  | 2   |

### 3 MSD plots

The plots in this section show the mean squared displacement of the centre-of-mass of the molecules listed. The black line in each plot is the ensemble average of 80 promoter molecules or 160 methanol molecules. The vertical green line on each plot shows the point from which the diffuse regime is assumed; all data after this point is used in estimating diffusion coefficients. From darkest to lightest, the blue-shaded regions show the 68<sup>th</sup>, 97.5<sup>th</sup>, and the 99.7<sup>th</sup> percentiles.

#### 3.1 Aliphatic ester promoters

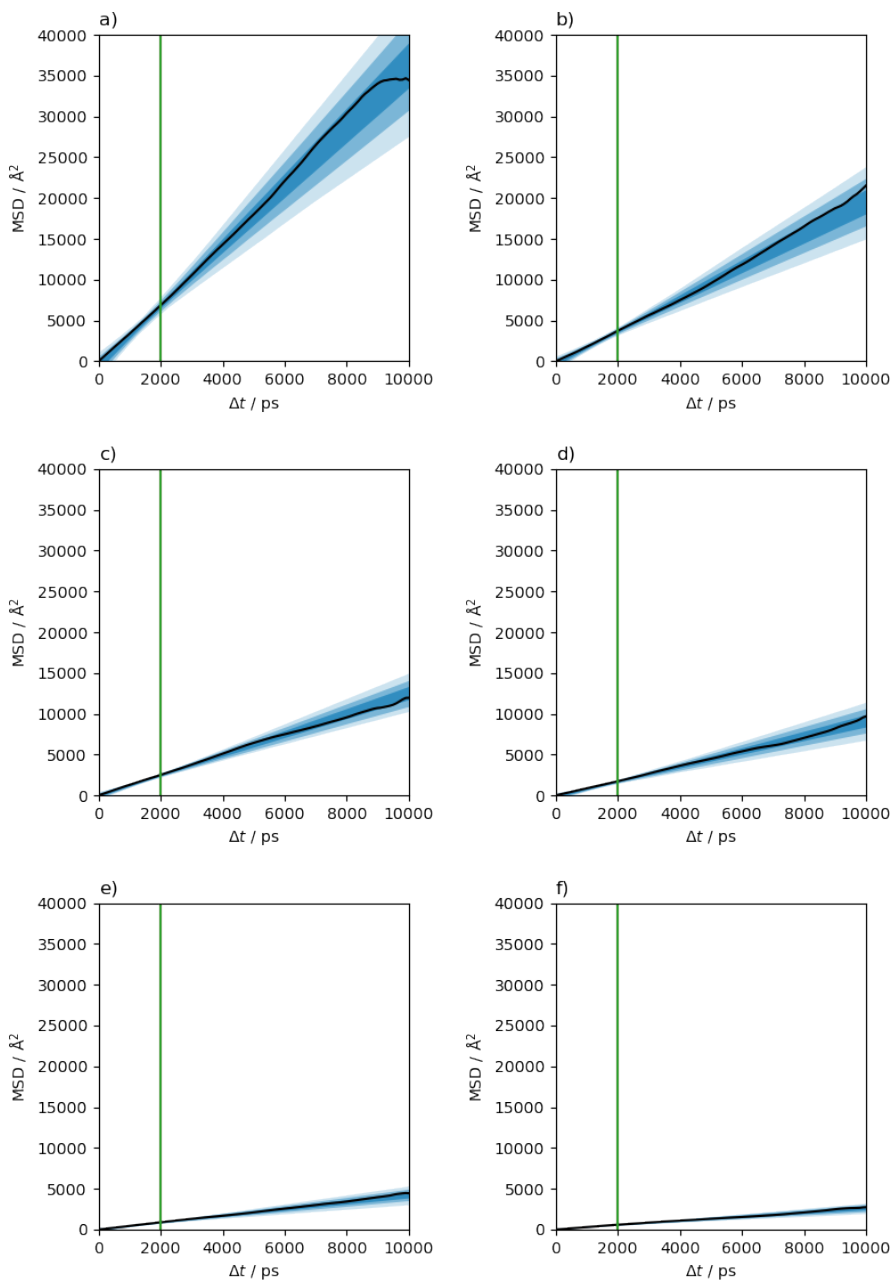

**Figure 1** Aliphatic ester promoters without methanol: a) methyl formate b) methyl acetate c) methyl propionate d) methyl butyrate e) methyl pentanoate f) methyl hexanoate

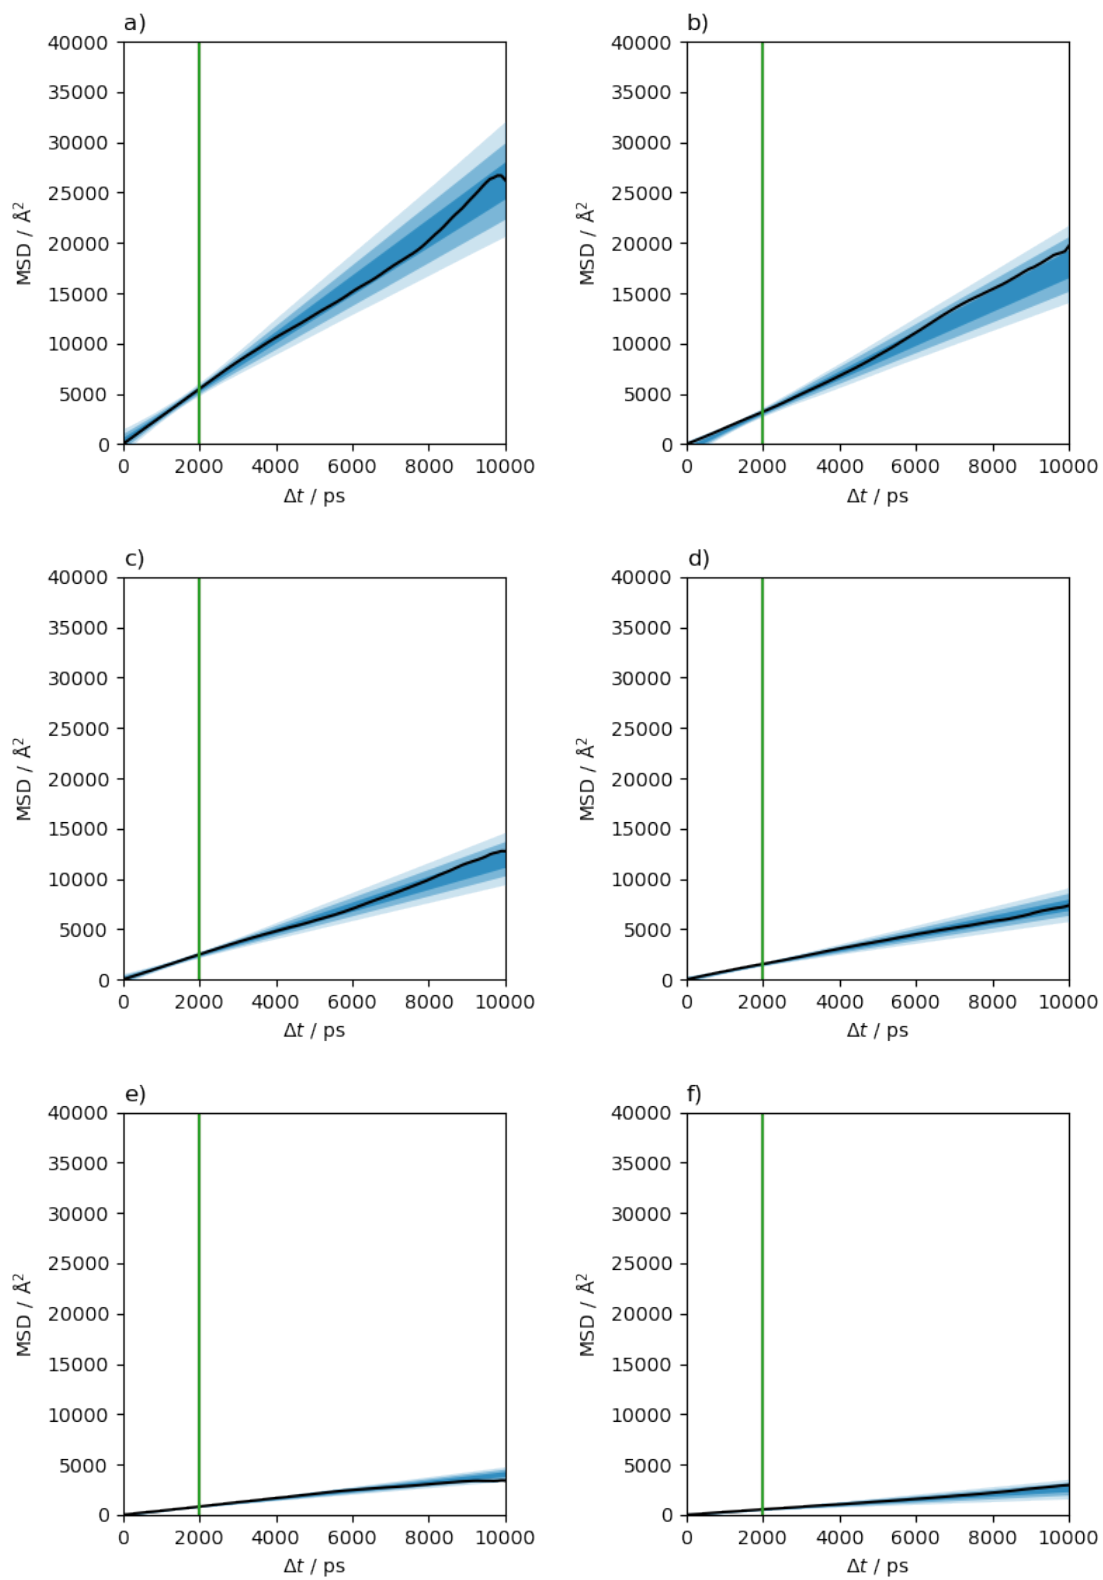

**Figure 2** Aliphatic ester promoters with methanol: a) methyl formate b) methyl acetate c) methyl propionate d) methyl butyrate e) methyl pentanoate f) methyl hexanoate

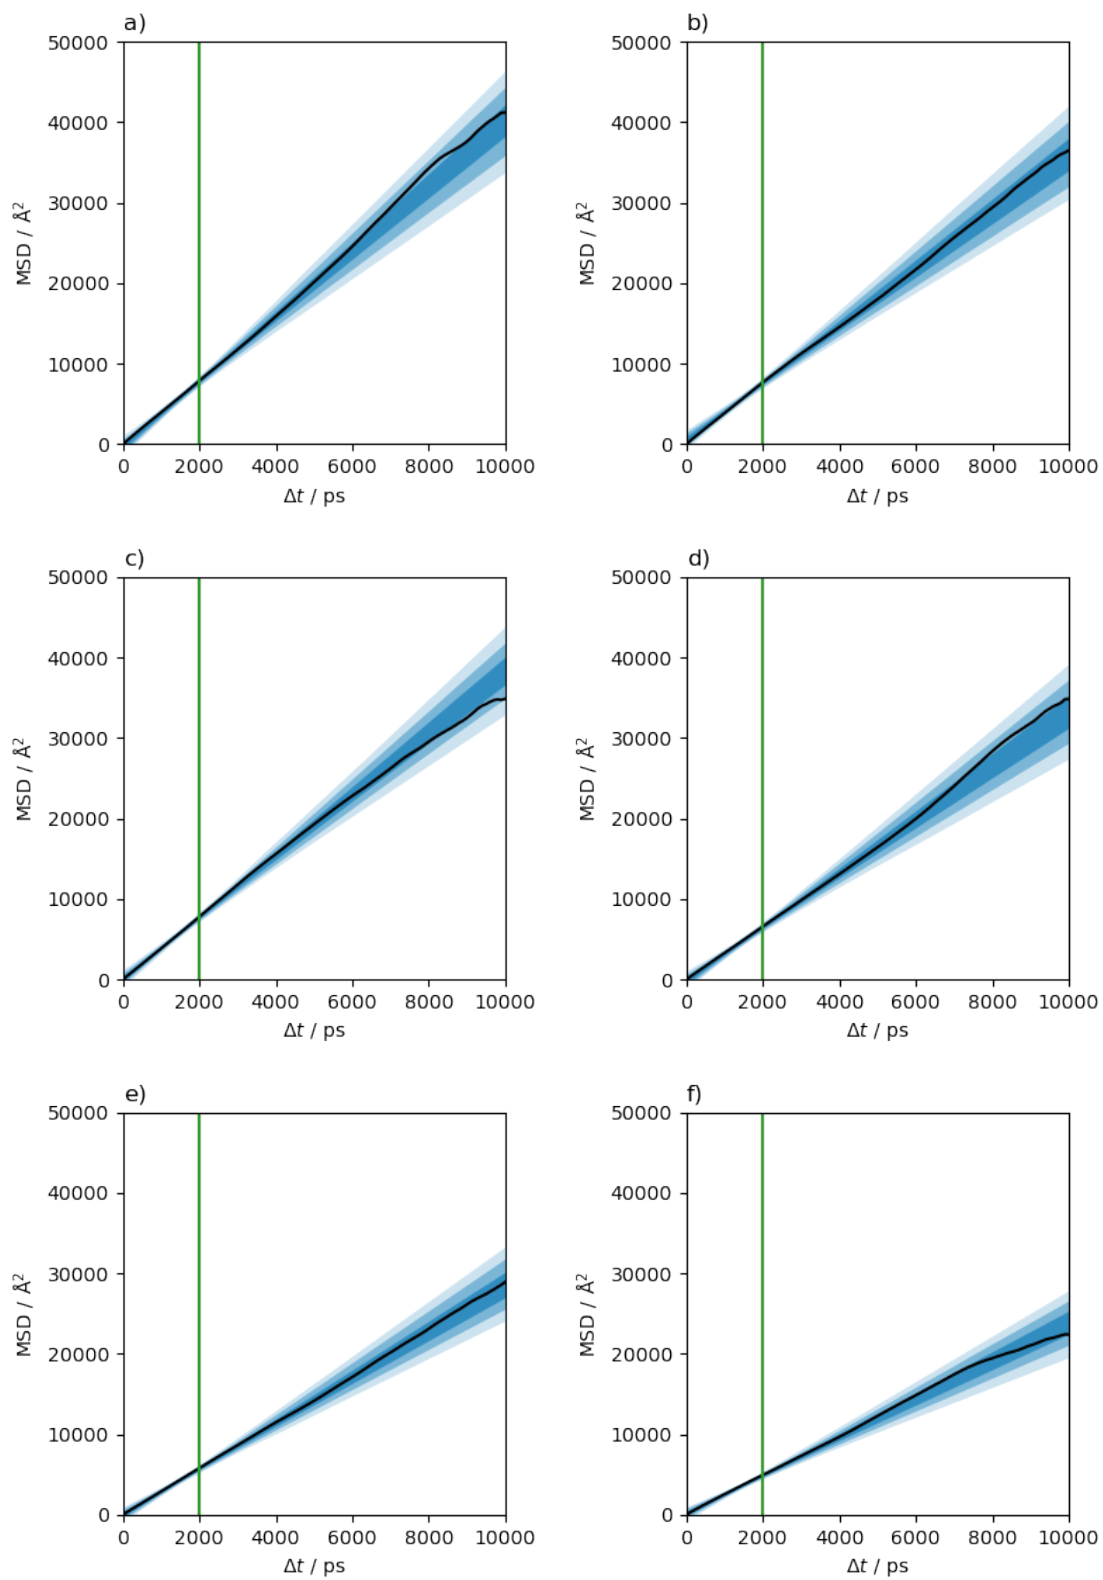

**Figure 3** Methanol with aliphatic ester promoters: a) methyl formate b) methyl acetate c) methyl propionate d) methyl butyrate e) methyl pentanoate f) methyl hexanoate

### 3.2 Aromatic aldehyde promoters

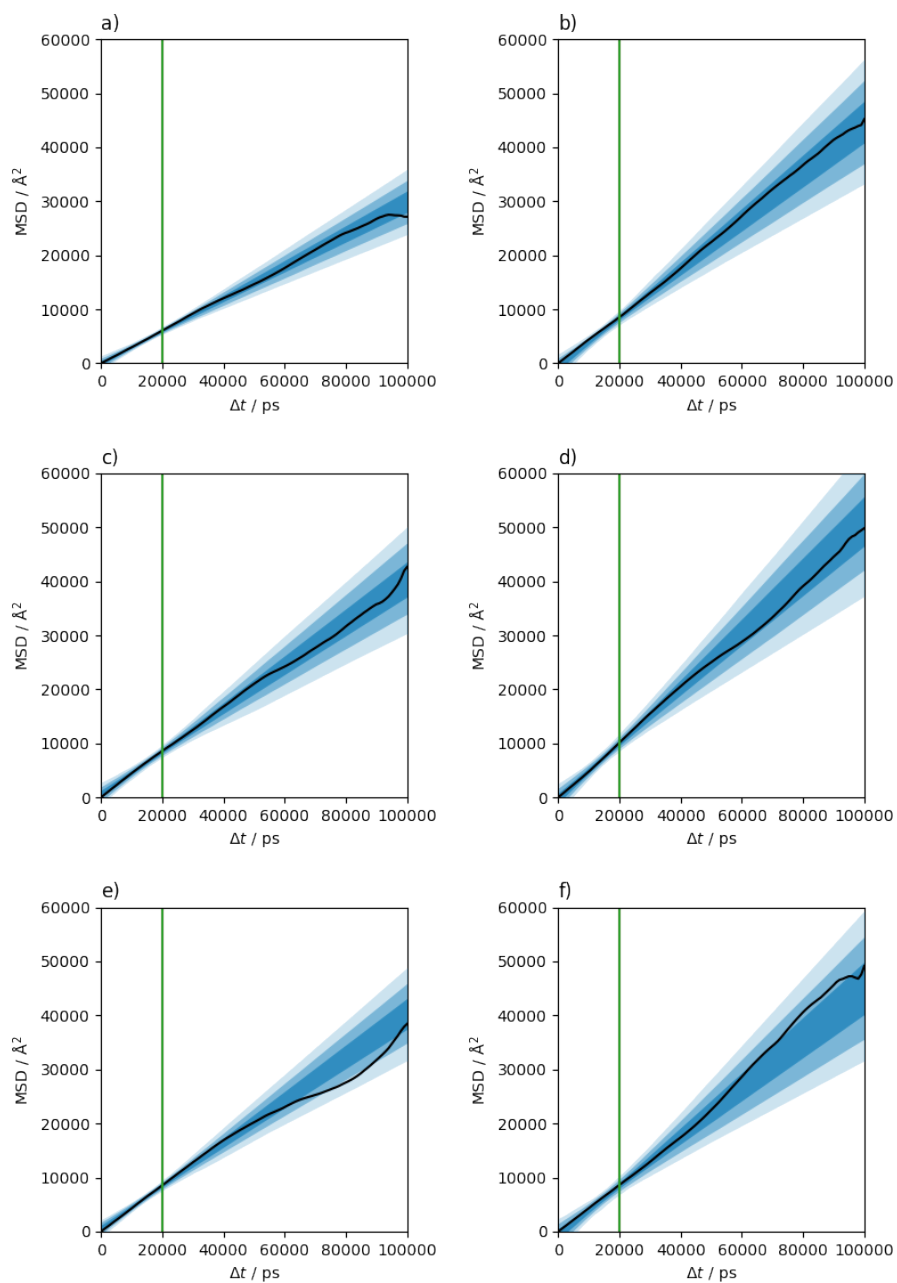

**Figure 4** Aromatic aldehyde promoters without methanol: a) benzaldehyde b) 4-methyl benzaldehyde c) 4-ethyl benzaldehyde d) 4-*n*-propyl benzaldehyde e) 4-*n*-butyl benzaldehyde f) 4-*n*-pentyl benzaldehyde



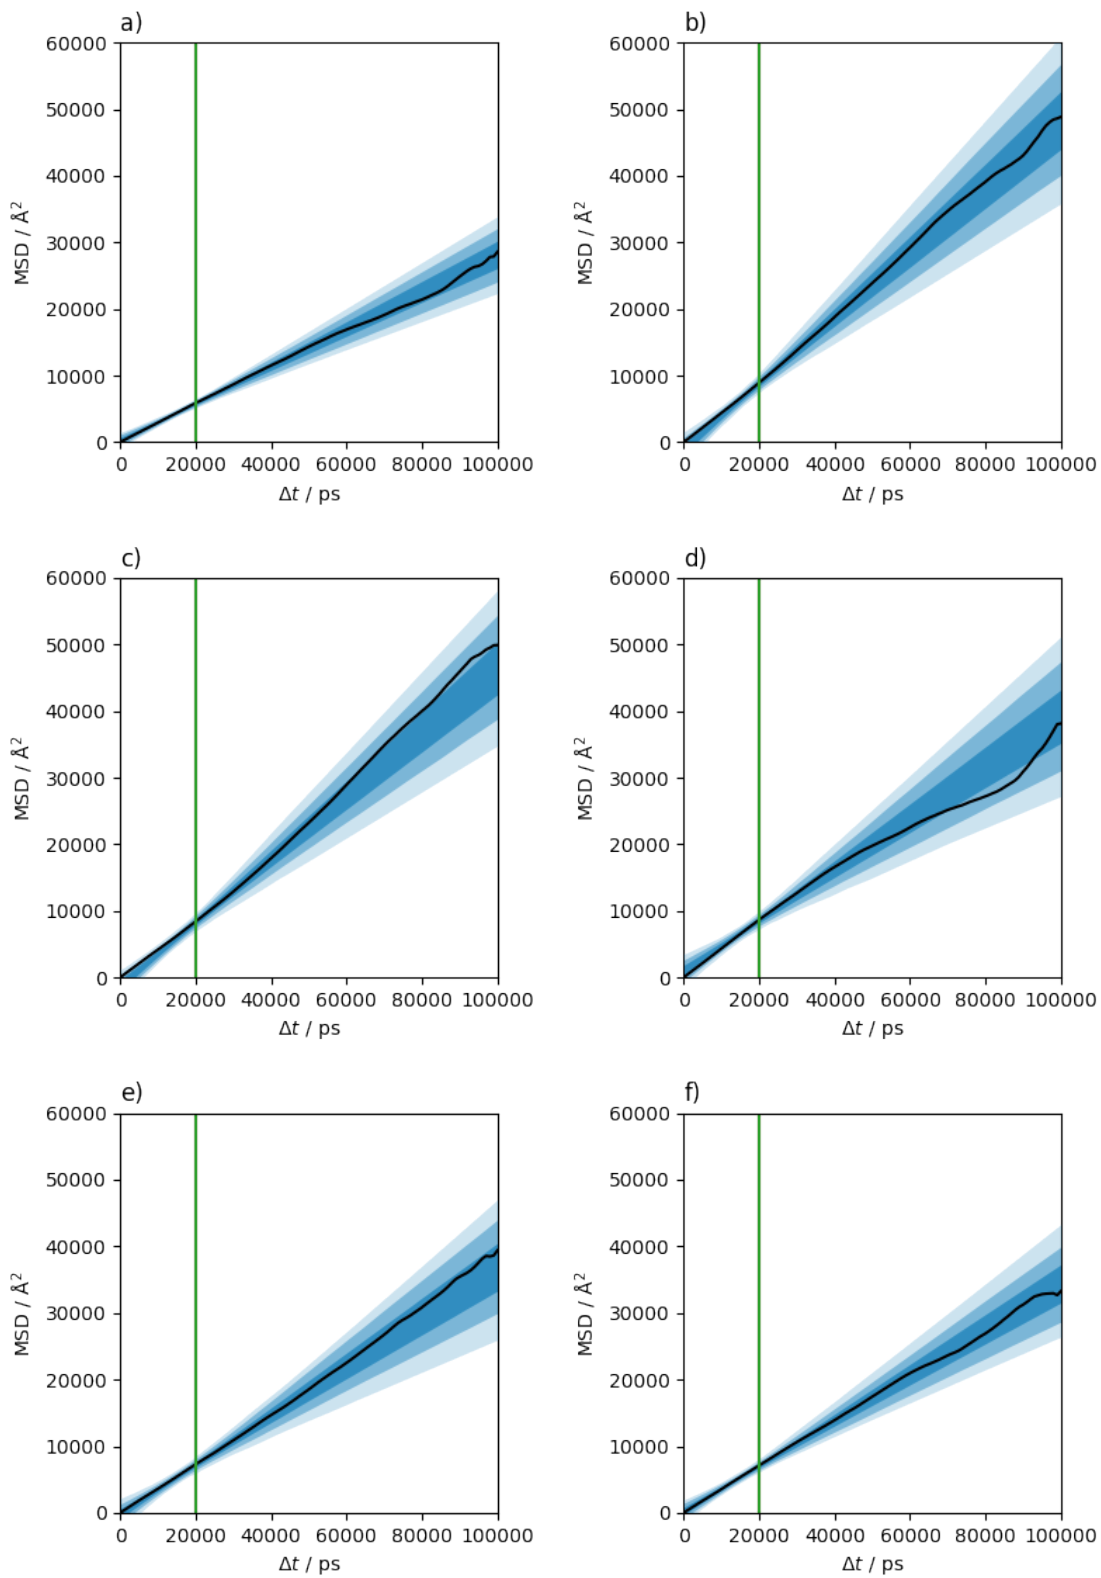

**Figure 5** Aromatic aldehyde promoters with methanol: a) benzaldehyde b) 4-methyl benzaldehyde c) 4-ethyl benzaldehyde d) 4-*n*-propyl benzaldehyde e) 4-*n*-butyl benzaldehyde f) 4-*n*-pentyl benzaldehyde

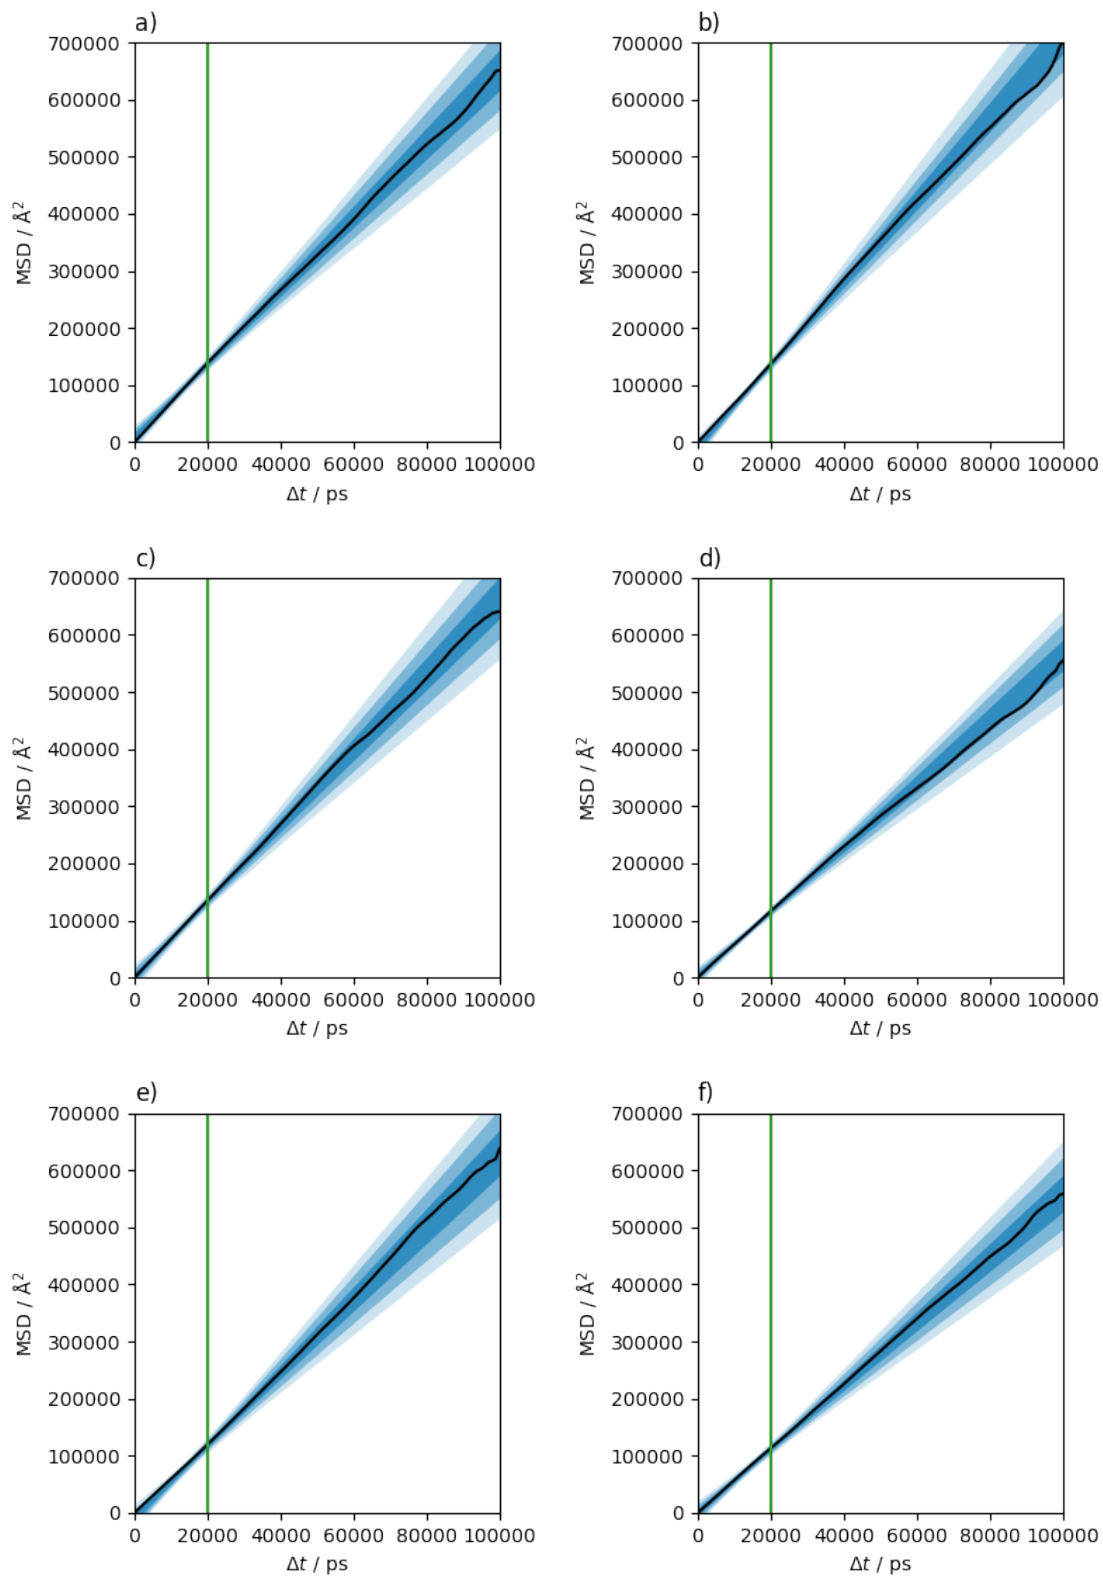

**Figure 6** Methanol with aromatic aldehyde promoters: a) benzaldehyde b) 4-methyl benzaldehyde c) 4-ethyl benzaldehyde d) 4-n-propyl benzaldehyde e) 4-n-butyl benzaldehyde f) 4-n-pentyl benzaldehyde

## 4 Spatial Probability Distribution

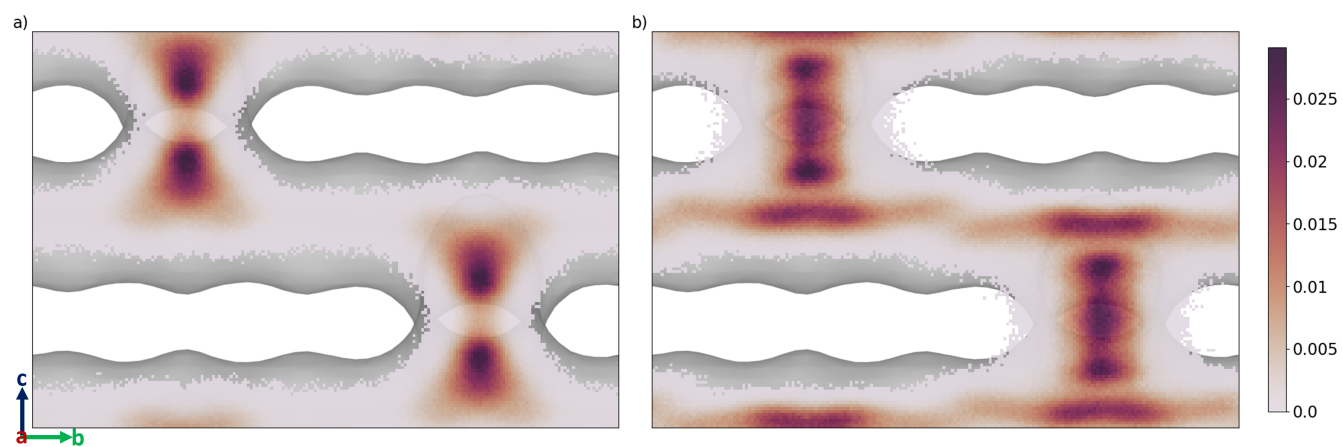

**Figure 7** Spatial probability distribution of the molecular centre of mass, in *b* and *c*, of a) benzaldehyde and b) 4-*n*-pentyl benzaldehyde, overlaid on the internal surface of ZSM-5 (Ovito was used to produce this surface with the Gaussian density method<sup>5</sup>).

## 5 Thermostat tests

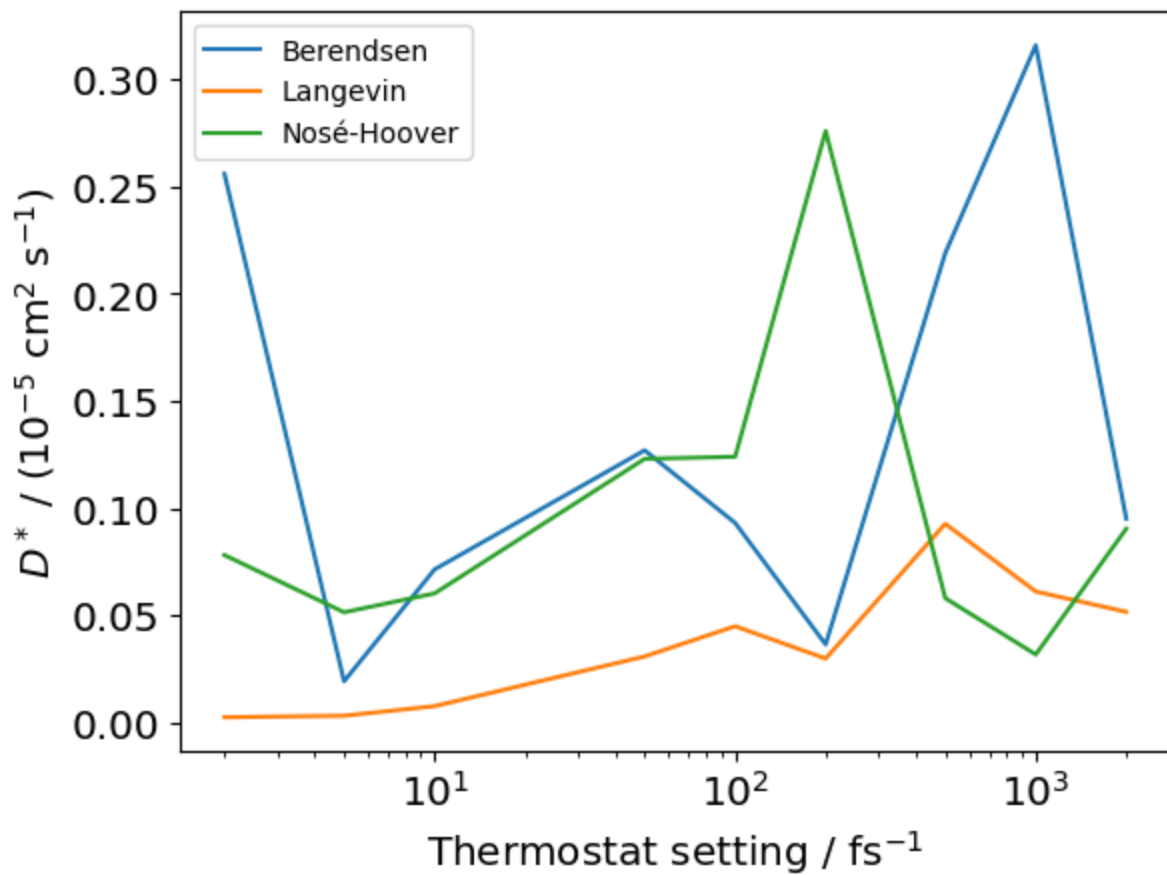

Figure 8 Diffusion coefficients of 4-*n*-pentyl benzaldehyde calculated from simulations with different thermostats and thermostat settings.

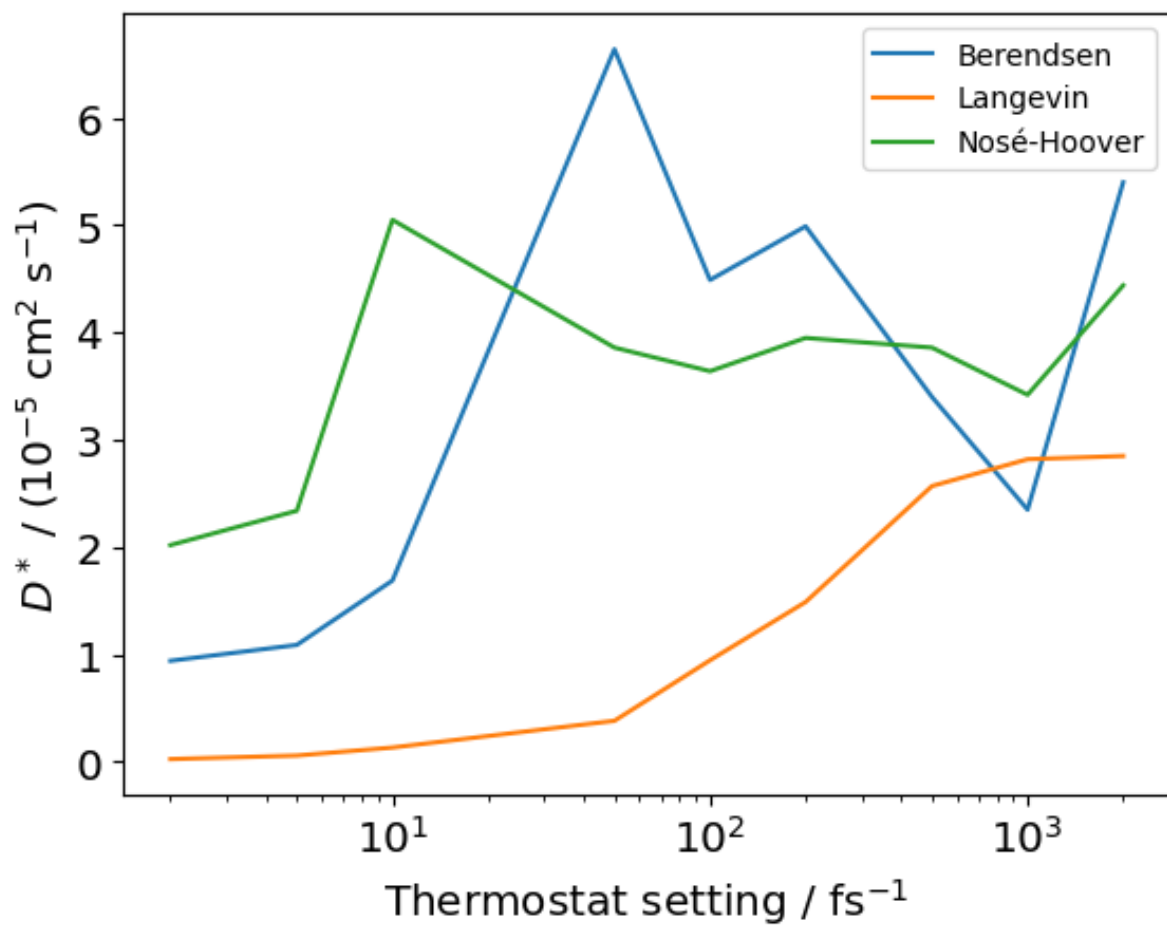

**Figure 9** Diffusion coefficients of methanol in the presence of 4-*n*-pentyl benzaldehyde calculated from simulations with different thermostats and thermostat settings.

## References

- [1] H. G. Ch. Baerlocher, L.B. McCusker and B. Marler, *Database of Disordered Zeolite Structures*, <http://www.iza-structure.org/databases/>, 23-June-2022, Accessed: 23-November-23.
- [2] R. W. Hockney and J. W. Eastwood, *Computer simulation using particles*, crc Press, 2021.
- [3] W. L. Jorgensen and J. Tirado-Rives, *Proceedings of the National Academy of Sciences*, 2005, **102**, 6665–6670.
- [4] L. S. Dodda, J. Z. Vilseck, J. Tirado-Rives and W. L. Jorgensen, *The Journal of Physical Chemistry B*, 2017, **121**, 3864–3870.
- [5] A. Stukowski, *Modelling and Simulation in Materials Science and Engineering*, 2009, **18**, 015012.
